# Supplementary material for: Giving a Hand: Synthetic Peptides Boost the Antifungal Activity of Itraconazole against <em>Cryptococcus Neoformans</em>
Source: Preprints.org preprint supplement (doi:10.20944/preprints202212.0467.v1), 2022-12-26
Supplement: Supplementary file 4 [file supplementary]

| **Sample** | **Concentration µg mL-1** | | |
| --- | --- | --- | --- |
|  | **[1x]** | **[5xD]** | **[10xD]** |
| Itraconazole | 500 a | 100 | 50 |
| Mo-CBP3-PepII | 25 a | 5 | 2.5 |
| RcAlb-PepII | 0.04 a | 0.008 | 0.004 |
| RcAlb-PepIII | 0.04 a | 0.008 | 0.004 |
| PepGAT | 0.04 a | 0.008 | 0.004 |
| PepKAA | 0.04 a | 0.008 | 0.004 |

**Supplementary Table 1.** Combinations and concentrations made of synthetic peptides and ITR

a MIC50 concentration defined by Aguiar et al. [7].
